# Supplementary material for: Preparation of resin-bound amine N-oxides and demonstration of their use in synthetic carbonyl cluster chemistry
Source: Royal Society of Chemistry journal article supplement (doi:10.1039/b100494h), 2001-01-01
Supplement: b100494h.doc [file b100494h.doc]

Preparation of Resin-Bound Amine *N*-Oxides and Demonstration of their Use in Synthetic Carbonyl Cluster Chemistry

**Nicholas E. Leadbeater*** **and Cornelia van der Pol**

Department of Chemistry, King’s College London, Strand, London, WC2R 2LS

United Kingdom

*nicholas.leadbeater@kcl.ac.uk*

# ELECTRONIC SUPPLIMENTARY INFORMATION:

# Experimental details

**General details.** All syntheses were performed under an inert atmosphere of dry nitrogen. All solvents were dried and degassed prior to use. Reagents were purchased from commercial sources and used as received unless noted otherwise including Merrifield’s solid-phase resin (Fluka, 2% crosslinked with divinylbenzene; 200-400 mesh; ~4.3 mmol Cl / g resin). The binary metal carbonyls Ru3(CO)12 and Os3(CO)12 were prepared by literature methods from RuCl3.H2O[[1]](#endnote-2) and OsO4[[2]](#endnote-3) respectively. Yields of products are shown in Table 1.

**Preparation of polymer-supported ‘benzylpiperidine *N*-oxide’ (1).** To a dioxane solution of Merrifield’s solid-phase resin (2 g in 50 ml) was added a five-fold excess of piperidine (3.6 g, 46 mmol) and the reaction mixture heated at 70 C for 16 h. After allowing the mixture to cool, the resin was filtered off and washed thoroughly with dioxane and then dichloromethane. The loading of amine on the beads was estimated by elemental analysis of the chloride content and was found to be approximately 2.0 mmol / g resin. The amine *N*-oxide was prepared by dropwise addition of *m*-chloroperbenzoic acid (*m*-CPBA) in chloroform (1.2 g, 6.0 mmol in 10 ml) to a chloroform solution of amine beads (1g in 30 ml) at 0 C. The solution was then allowed to warm to room temperature and stir for 16 h. The resin was then filtered off and washed thoroughly with the following solvents in order: chloroform, methanol and finally dichloromethane. The loading of amine on the beads was estimated by elemental analysis and was found to be approximately 0.9 mmol / g resin.

##### Preparation of polymer-supported ‘diethylbenzylamine *N*-oxide’ (2). The preparation of 2 was analogous to that of 1 but using diethylamine in place of piperidine. The loading of amine on the beads was found to be approximately 2.3 mmol / g resin. Treatment with *m*-CPBA led to the amine *N*-oxide with a loading of approximately 1.0 mmol / g resin.

**Use of 1 and 2 in the synthesis of Ru3(CO)11(MeCN) (3a).** To a dichloromethane / acetonitrile (10:1) solution of Ru3(CO)12(20 mg, 0.03 mmol in 30 ml) at –78 C was added **1** (33 mg; 0.03 mmol *N*-oxide) and the reaction mixture allowed to warm to room temperature. Filtration to remove the polymer beads followed by slow removal of the solvents under reduced pressure led to an orange microcrystalline powder, characterized as **3a** in the basis of its IR spectrum. IR (MeCN)  CO: 2098(w), 2043(vs), 2005(s) cm-1.

The preparation using **2** was analogous to that with **1** but using **2** (30 mg; 0.03 mmol *N*-oxide).

**Use of 1 and 2 in the synthesis of Ru3(CO)10(MeCN)2 (4a).** To a dichloromethane / acetonitrile (5:1) solution of Ru3(CO)12(20 mg, 0.03 mmol in 30 ml) at –78 C was added **1** (84 mg; 0.075 mmol *N*-oxide) and the reaction mixture allowed to warm to room temperature. Filtration to remove the polymer beads followed by slow removal of the solvents under reduced pressure led to an orange microcrystalline powder, characterized as **4a** in the basis of its IR spectrum. IR (MeCN) CO: 2082(w), 2018(vs), 1998(s), 1987(sh), 1954(m), 2043(vs), 2043(vs), 1820(s, br) cm-1.

The preparation using **2** was analogous to that with **1** but using **2** (75 mg; 0.068 mmol *N*-oxide).

**Use of 1 and 2 in the synthesis of Os3(CO)11(MeCN) (3b).** To a dichloromethane / acetonitrile (10:1) solution of Os3(CO)12(18 mg, 0.02 mmol in 30 ml) at room temperature was added **1** (22 mg; 0.02 mmol *N*-oxide) and the reaction mixture allowed to stir for 2 h. Filtration to remove the polymer beads followed by slow removal of the solvents under reduced pressure led to an orange microcrystalline powder, characterized as **3b** in the basis of its IR spectrum. IR (MeCN)  CO: 2107(w), 2054 (vs), 2040 (vs), 2017 (sh), 2008 (vs), 1981(m) cm-1.

The preparation using **2** was analogous to that with **1** but using **2** (20 mg; 0.02 mmol *N*-oxide).

**Use of 1 and 2 in the synthesis of Os3(CO)10(MeCN)2 (4b).** To a dichloromethane / acetonitrile (5:1) solution of Os3(CO)12(18 mg, 0.02 mmol in 30 ml) at room temperature was added **1** (210 mg; 0.188 mmol *N*-oxide) and the mixture allowed to stir for 2 h. Filtration to remove the polymer beads followed by slow removal of the solvents under reduced pressure led to an orange microcrystalline powder, characterized as **4b** in the basis of its IR spectrum. IR (CH2Cl2) CO: 2079(w), 2025(sh), 2020(vs), 1983(m), 1960(w) cm-1.

The preparation using **2** was analogous to that with **1** but using **2** (188 mg; 0.170 mmol *N*-oxide).

1. . Eady, C.R.; Jackson, P.F.; Johnson, B.F.G.; Lewis, J.; Malatesta, M.C.; McPartlin, M.; Nelson, W.J.H. *J. Chem. Soc., Dalton. Trans.* **1980**, 383. [↑](#endnote-ref-2)
2. . Johnson B.F.G.; Lewis, J. *Inorg. Synth.* **1976**,*16*, 47. [↑](#endnote-ref-3)
